# Supplementary material for: Oligomeric Procyanidins Interfere with Glycolysis of Activated T Cells. A Novel Mechanism for Inhibition of T Cell Function
Source: MDPI journal article supplement (doi:10.3390/molecules201019014), 2015-10-20
Supplement: s1 [file s1]

## Supplementary Materials

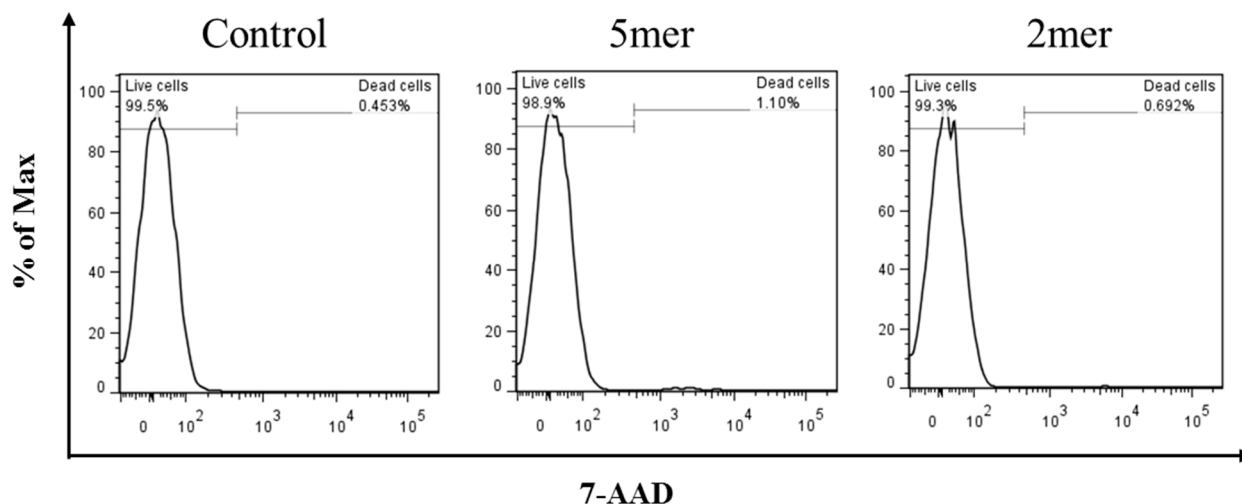

**Figure S1.** Toxicity of pentameric or dimeric procyanidin on the activated CD4<sup>+</sup> T cells. To assess toxicity of procyanidins, splenic CD4<sup>+</sup> T cells stimulated with an anti-CD3 $\epsilon$  monoclonal antibody (mAb) in the presence of pentameric or dimeric procyanidin (25  $\mu$ M) for 24 h, followed by staining with 7-Aminoactinomycin D (7-AAD). The group without oligomeric procyanidins treatment was indicated as control.

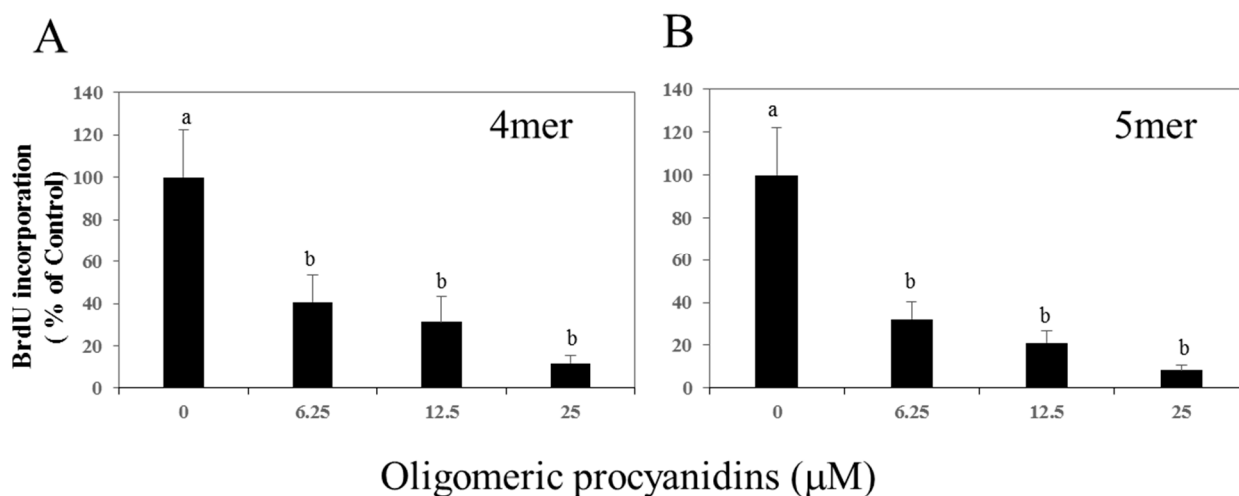

**Figure S2.** Dose-dependent effects of oligomeric procyanidins on cell proliferation of activated CD4<sup>+</sup> T cells. Splenic CD4<sup>+</sup> T cells were stimulated with an anti-CD3 $\epsilon$  monoclonal antibody in the presence of tetrameric (A) or pentameric (B) procyanidins (0–25  $\mu$ M). Cell proliferation was evaluated by measuring the BrdU incorporation after 72 h of stimulation. The group without oligomeric procyanidins treatment (0  $\mu$ M) was indicated as control. The data shown are the means  $\pm$  SD from three independent experiments. Values not sharing a common letter (a, b) differ significantly at  $p < 0.05$  by the Tukey-Kramer multiple comparison test.

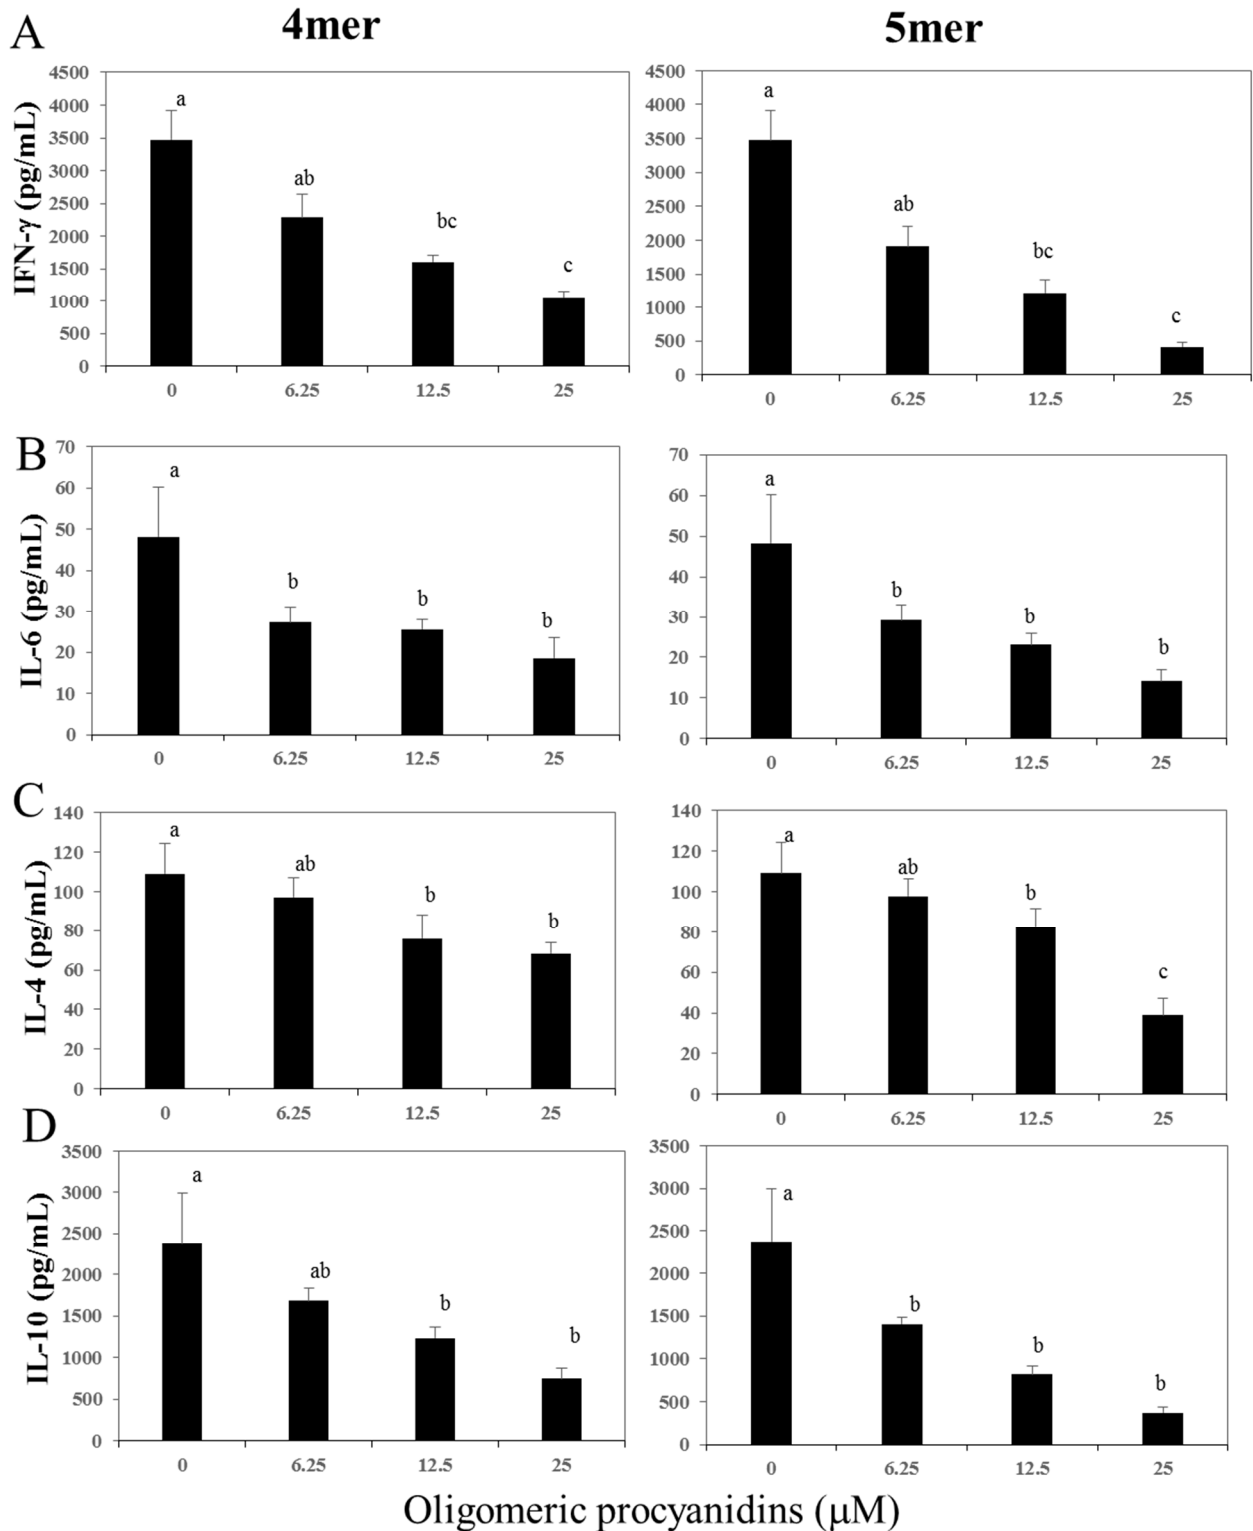

**Figure S3.** Dose-dependent effects of oligomeric procyanidins on the production of the effector cytokines, interferon (IFN)- $\gamma$  (A); interleukin (IL)-6 (B); IL-4 (C); and IL-10 (D) by activated CD4<sup>+</sup> T cells. Splenic CD4<sup>+</sup> T cells were stimulated with an anti-CD3 $\epsilon$  monoclonal antibody in the presence of tetrameric or pentameric procyanidins (0–25  $\mu\text{M}$ ). The data shown are the means  $\pm$  SD from triplicate cultures. Values not sharing a common letter (a, b, c) differ significantly at  $p < 0.05$  by the Tukey–Kramer multiple comparison test.

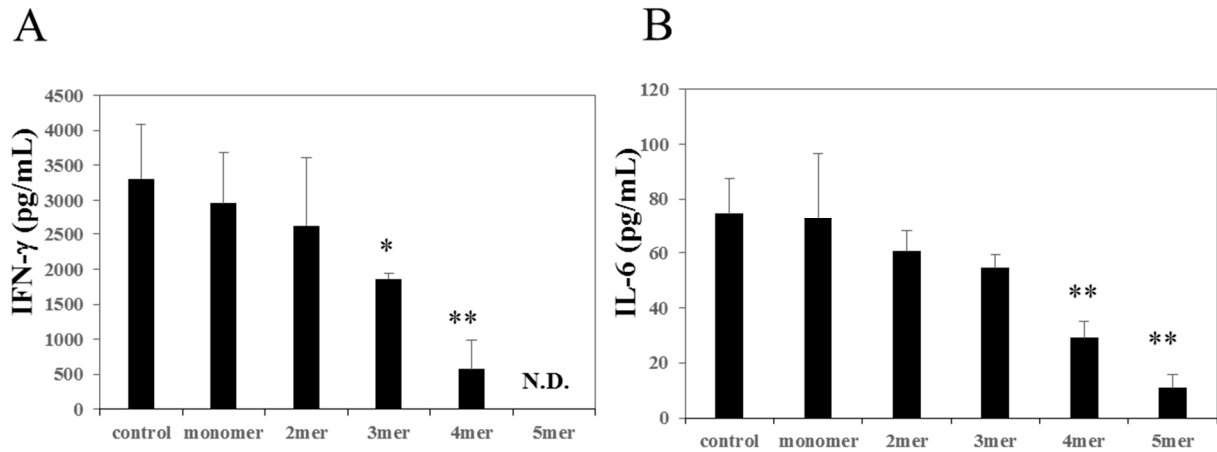

**Figure S4.** Effects of oligomeric procyanidins on the production of the effector cytokines, interferon (IFN)- $\gamma$  (A) and interleukin (IL)-6 (B) of activated splenocytes from naïve DO11.10 mice. Pooled splenocytes were stimulated with 7.5  $\mu$ M of ovalbumin (OVA) in the presence of oligomeric procyanidins (25  $\mu$ M). The data shown are the means  $\pm$  SD from triplicate cultures. Statistical comparisons were performed using analysis of variance with Dunnett's multiple comparison of means test. Significance is relative to a negative control (\*  $p < 0.05$ , \*\*  $p < 0.01$ ).
